## ***Title***

Association between high serum favipiravir concentrations and drug-induced liver injury

## ***Authors***

Hitoshi Kawasuji<sup>1</sup>, Yasuhiro Tsuji<sup>2</sup>, Chika Ogami<sup>2</sup>, Yusuke Takegoshi<sup>1</sup>, Makito Kaneda<sup>1</sup>, Yushi Murai<sup>1</sup>, Kou Kimoto<sup>1</sup>, Akitoshi Ueno<sup>1</sup>, Yuki Miyajima<sup>1</sup>, Yasutaka Fukui<sup>1</sup>, Kentaro Nagaoka<sup>1</sup>, Ippei Sakamaki<sup>1</sup>, Yoshitomo Morinaga<sup>3</sup>, Yoshihiro Yamamoto<sup>1#</sup>

## ***Affiliations***

1. Department of Clinical Infectious Diseases, Graduate School of Medicine and Pharmaceutical Sciences, University of Toyama
2. Center for Pharmacist Education, School of Pharmacy, Nihon University
3. Department of Microbiology, Toyama University Graduate School of Medicine and Pharmaceutical Sciences, University of Toyama

## ***Locations***

1. 2630 Sugitani, Toyama, 930-0194, Japan
2. 7-7-1 Narashinodai, Funabashi, Chiba, 274-8555, Japan
3. 2630 Sugitani, Toyama, 930-0194, Japan

# Correspondence: Yamamoto Yoshihiro,

Department of Clinical Infectious Diseases, Graduate School of Medicine and Pharmaceutical Sciences, University of Toyama,

2630 Sugitani, Toyama, 930-0194, Japan.

Tel: 076-434-7245, E-mail: [yamamoto@med.u-toyama.ac.jp](mailto:yamamoto@med.u-toyama.ac.jp)

***Word count***

Main text: 2288 words (from introduction to conclusion)

Abstract: 200 words

Tables, 2; Figures, 2.

## **Abstract**

### ***Objectives***

This study aimed to evaluate the incidence and pattern of favipiravir-induced liver injury and the potential association between serum concentrations in hospitalized COVID-19 patients.

### ***Patients and methods***

We retrospectively reviewed laboratory-confirmed patients with COVID-19 for whom serum favipiravir trough concentration ( $C_{\min}$ ) was measured under steady-state conditions during treatment. All patients were administered 1800 mg of favipiravir twice daily on the first day and 800 mg twice daily from the second day.

### ***Results***

Thirty observed favipiravir concentrations were collected from nine patients. Of these, favipiravir-induced liver injury developed in three patients after 13 (11–14) days from the initiation of therapy, with two classified as cholestatic and one hepatocellular injury, with a score of four (possible), seven (probable), and three (possible) based on the CIMOS/RUCAM scoring system. Median (range) favipiravir  $C_{\min}$  at steady state was found to be significantly higher in patients with liver injury at 66.4 (47.8–72.4) mg/L than in those without injury at 12.8 (9.4–21.8) mg/L ( $P = 0.028$ ).

### ***Conclusions***

Higher favipiravir serum concentrations were observed in patients who developed favipiravir-induced liver injury than in those who did not. As the variations in favipiravir concentrations between patients were large, personalized optimal dosing strategies may be needed for safe use.

## **Keywords**

COVID-19, favipiravir, drug-induced liver injury, pharmacokinetics

## 1 **1. Introduction**

2       Coronavirus disease (COVID-19) caused by severe acute respiratory syndrome-  
3 coronavirus 2 (SARS-CoV-2) has rapidly spread to more than 200 countries, with more than 1.4  
4 hundred million confirmed cases and 3.0 million deaths to date [1]. Various drugs have been  
5 used to treat patients with COVID-19, and their efficacy has been evaluated to identify a  
6 breakthrough therapy.

7       Favipiravir is a modified pyrazine analog that inhibits RNA-dependent RNA polymerases,  
8 which ultimately prevents viral transcription and replication of RNA viruses. Favipiravir, which  
9 was initially developed by Toyama Chemical Co., Ltd., as a drug to treat the influenza virus  
10 infection, is expected to exhibit antiviral activity against SARS-CoV-2; however, information  
11 about its efficacy, particularly its related pharmacokinetics, remains limited.

12       The recommended dosing protocol for favipiravir in COVID-19 is 1800 mg twice a day  
13 on day 1 and 800 mg twice a day from day 2 to 10 days (maximum 14 days). Although  
14 favipiravir is regarded as safe in various studies, the risks of teratogenicity, hyperuricemia, and  
15 drug fever should be considered [2, 3]. Elevated blood uric acid levels are a frequent side effect  
16 of favipiravir. However, blood uric acid levels normalize quickly after discontinuation of  
17 favipiravir, and few symptoms due to hyperuricemia have been observed in most studies [4].  
18 Subsequently, abnormal liver tests and/or liver injury are also important adverse effects observed  
19 frequently in some clinical trials [5, 6], which sometimes lead to discontinuation of therapy;  
20 however, case reports on favipiravir-induced liver injury are limited, and no previous study has  
21 reported an association between favipiravir-induced liver injury and serum concentrations [7].

22       The present study aimed to investigate the variations in favipiravir serum concentrations  
23 during treatment between individual patients and evaluate the incidence and pattern of  
24 favipiravir-induced liver injury, and the potential association between serum concentrations in  
25 laboratory-confirmed hospitalized patients with COVID-19.

26

27

## 1 **2. Patients and methods**

### 2 **2.1 Study design**

3 Clinical data, including favipiravir concentrations, were collected from laboratory-  
4 confirmed patients with COVID-19 who were admitted to Toyama University Hospital from  
5 April 2020 to February 2021 and treated using favipiravir. Patients with at least one favipiravir  
6 serum  $C_{\min}$  measured under steady-state conditions, a minimum of 48 h after favipiravir initiation,  
7 during favipiravir treatment were included in this study. All patients were administered 1800 mg  
8 of favipiravir twice daily as a loading dose on day 1 and 800 mg twice daily as a maintenance  
9 dose from day 2 and thereafter.

### 10 **2.2 Data Collection**

11 A retrospective chart review was performed for all individuals in the study to identify basic  
12 demographic and clinical characteristics, medical history and comorbidities, clinical presentation  
13 and severity, possible adverse effects of favipiravir, treatment duration, and concomitant  
14 medications. Severity was divided into five categories: asymptomatic; mild (symptomatic  
15 patients without pneumonia); moderate (pneumonia patients without required oxygen  
16 supplementation); severe (required oxygen supplementation); and critically ill (requiring  
17 invasive mechanical ventilation, shock, and/or multiple organ dysfunction). Hematological and  
18 serum chemistry analyses performed during hospitalization, even after the end of favipiravir  
19 treatment, were retrieved and compared over time.

### 20 **2.3 Assessment of hyperuricemia and favipiravir-induced liver injury**

21 Regarding the definition of liver injury, the laboratory threshold criteria used to identify  
22 episodes of drug-induced liver injury and their clinical pattern (hepatocellular, cholestatic, or  
23 mixed) were based on international Drug-Induced Liver Injury (DILI) Expert Working Group  
24 Standards [8]. For hepatocellular liver injury, we required liver chemistry thresholds of alanine  
25 transferase (ALT)  $\geq 5 \times$  upper limit of normal (ULN) and  $R \geq 0.5$ , where the R-value was  
26 calculated as (ALT/ALT ULN)/(alkaline phosphatase [ALP]/ALP ULN). The cholestatic liver  
27 injury required ALP  $\geq 2 \times$  ULN and  $R \leq 0.2$ , and the mixed liver injury required ALT  $\geq 5 \times$   
28 ULN and  $0.2 < R < 0.5$  [8]. The earliest liver chemistry elevations meeting the threshold  
29 criteria were used to determine the clinical pattern and liver injury date. The ALP values

1 measured using the Japan Society of Clinical Chemistry method (x) were converted to the  
2 International Federation of Clinical Chemistry and Laboratory Medicine method (y) using the  
3 following formula:  $y=0.35x$ . The Roussel Uclaf Causality Assessment Method (RUCAM), which  
4 is the most widely used method to assess causality in drug-induced liver injury, was used to  
5 assess the causality between favipiravir and liver injury [9].

#### 6 **2.4 Determination of favipiravir concentration**

7 Steady-state serum  $C_{\min}$  was defined as the total concentration collected 9–15 h after the  
8 dose and before administration of favipiravir at  $\geq 48$  h after favipiravir initiation. Favipiravir  
9 concentrations were determined using residual serum samples from the clinical examination, and  
10 the serum samples collected from the patients were stored in a freezer ( $-80^{\circ}\text{C}$ ) until measurement.  
11 The times of oral administration and blood collection were carefully checked, and samples  
12 deemed inappropriate were excluded from the analysis. Favipiravir concentrations in the serum  
13 were determined using high-performance liquid chromatography (Shimadzu Corp., Kyoto,  
14 Japan). Favipiravir (CAS No.: 259793-96-9) was purchased as a bulk powder from Cosmo Bio  
15 Co., Ltd. (Tokyo, Japan). Separation was carried out on an aminopropyl column (Unison UK-  
16 Amino,  $150 \times 3$  mm,  $3 \mu\text{m}$ ; Imtakt Co., Kyoto, Japan), and 0.1% acetic acid solution was used as  
17 the mobile phase. The lower limit of quantification was 0.5 mg/L (coefficient of variation <  
18 10%), and the lower limit of detection was 0.1 mg/L.

#### 19 **2.5 Statistical analysis**

20 Continuous and categorical variables are presented as median (interquartile range) and n  
21 (%), respectively. We used the Mann–Whitney U test,  $\chi^2$  test, or Fisher's exact test to compare  
22 the differences between patients with and without favipiravir-induced liver injury. Data were  
23 analyzed using JMP Pro version 15.0.0 software (SAS Institute Inc., Cary, NC, USA).

#### 24 **2.6 Ethics approval**

25 This study was performed as per the Declaration of Helsinki and was approved by the  
26 Ethical Review Board of the University of Toyama (approval numbers: R2019167 and  
27 R2020146) and Nihon University (School of Pharmacy, approval number: 20-005). Written  
28 informed consent was obtained from all patients.

1

## 2 **3. Results**

### 3 **3.1 Demographics and clinical characteristics**

4 Demographics and clinical characteristics of all nine patients (seven men and two  
5 women) treated with favipiravir are summarized in Tables 1 and 2. The median age of the  
6 patients was 62 years (range, 53–90 years). Hypertension was the most common comorbidity,  
7 followed by dyslipidemia and diabetes. There were no patients with the hepatic disease with  
8 impaired liver function; however, two patients demonstrated fatty liver on computed tomography  
9 at admission. Three patients habitually ingested alcohol, which was defined as > 2 drinks per day  
10 (> 14 units/week) for women and > 3 drinks per day (> 21 units/week) for men, and 10 g ethanol  
11 for each drink. Regarding the severity of COVID-19, two patients had moderate disease, five had  
12 severe disease, and the remaining two patients were critically ill. All patients were administered  
13 1800 mg of favipiravir twice daily as loading on day 1 and 800 mg twice daily as a maintenance  
14 dose from day 2 and thereafter. Favipiravir administration was discontinued in three patients due  
15 to favipiravir-induced liver injury in patient 3 and suspected favipiravir-induced drug fever in  
16 two patients (patients 2 and 8).

17 Baseline laboratory findings before the administration of favipiravir are also described in  
18 Table 2. There were no significant differences between patients with and without liver injury in  
19 terms of patient demographics and clinical characteristics.

20

### 21 **3.2 Favipiravir-induced liver injury and association with trough concentrations**

22 Of the nine patients, favipiravir-induced liver injury developed in three patients during  
23 treatment. The severity of liver injury in these three episodes (patients 3, 4, and 5) assessed using  
24 the DILI severity index was mild with two classified as cholestatic (patients 3 and 4) and one as  
25 hepatocellular injury (patient 5), with a score of four (possible), seven (probable), and three  
26 (possible) based on the Research Center of Integrative Molecular Systems (CIMOS)/RUCAM  
27 scoring system. Other medications are also being considered; however, there has been no  
28 obvious relevance based on the clinical course. Among the three patients with favipiravir-  
29 induced liver injury, the median (range) time from the initiation of therapy to the development of



1 liver injury was 13 (11–14) days. The liver injury occurred during the remission of COVID-19 in  
2 all three patients, and the RT-qPCR results using nasopharyngeal swabs obtained 1–4 days after  
3 the development of liver injury, were negative; however, were confirmed after the end of  
4 favipiravir administration. One of three patients required discontinuation of favipiravir before the  
5 planned treatment duration; however, abnormal liver blood test results gradually improved after  
6 the end of favipiravir treatment in all patients. Median (range) favipiravir  $C_{\min}$  at steady state was  
7 found to be significantly higher in patients with liver injury at 66.4 (47.8–72.4) mg/L than in  
8 those without injury at 12.8 (9.4–21.8) mg/L ( $P = 0.028$ ; Figure 1).

9

### 10 **3.3 Variations in serum favipiravir trough concentrations**

11 A total of 30 observed favipiravir trough concentrations were collected from nine patients.  
12 The median (range)  $C_{\min}$  was 20.8 (3.1–72.4) mg/L with an obvious inter-individual variation. In  
13 addition, the median concentrations in patient 3 decreased from 115.5 (55.5–144.8) mg/L to 5.4  
14 (3.8–44.6) mg/L after introducing continuous hemodiafiltration (CHDF), along with the decrease  
15 of serum uric acid. Variations in favipiravir versus time are shown in Figure 2.

16

## 17 **4. Discussion**

18 Elevated liver function tests and/or liver injury are important adverse effects of  
19 favipiravir observed frequently in clinical trials [5, 6]. Since abnormal liver function tests (LFTs)  
20 are affected by various factors, including concomitantly administered drugs, underlying liver  
21 disease, and disease severity, case reports of favipiravir-induced liver injury are still few [7] and  
22 no previous study has reported an association between favipiravir-induced liver injury and serum  
23 concentrations.

24 The clinical trial US109, a human study of favipiravir that looked specifically at hepatic  
25 impairment, reported that mild and moderate hepatic impairment (Child-Pugh Turcotte score A  
26 and B) resulted in 2.1- and 2.0-fold increases in favipiravir exposure, respectively [10]. It may  
27 appear that high serum concentration was not the cause of favipiravir-induced liver injury, but  
28 subsequent results of favipiravir administration in patients with hepatic impairment. However,

1 high favipiravir serum  $C_{\min}$  was observed before the occurrence of favipiravir-induced liver  
2 injury, there were no patients with hepatic impairment and abnormal LFTs at baseline, and  
3 elevated liver function tests were recovered after discontinuation or end of favipiravir during  
4 hospitalization.

5 Another factor that should be considered is the potential role of liver damage caused by  
6 SARS-CoV-2. The incidence of LFT abnormalities in patients with COVID-19 varies among  
7 studies [11-13]; however, it may be present in up to half of the hospitalized patients with SARS-  
8 CoV-2 [14, 15]. Previous studies have indicated that the hepatocellular pattern is the most  
9 frequent LFT abnormality [11-13]. These alterations have largely been reported as mild-to-  
10 moderate elevations in serum transaminases. In contrast, Yeoman et al. reported that 31% of 318  
11 hospitalized patients with COVID-19 had one or more abnormal liver function tests and had  
12 abnormal admission in 64%, and cholestatic patterns dominated [15]. These gaps still exist, due  
13 to the largely unknown pathogenesis of liver damage by SARS-CoV-2, and other potential  
14 confounding factors, including systemic organ failure in critically ill patients and the effect of the  
15 administered drugs, also preclude detailed analysis of the causes of abnormal LFTs. The present  
16 study included five severe and two critically ill patients; however, liver injury in three patients  
17 (two severe and one critically ill) occurred not on admission, but after the clinical remission,  
18 inconsistent with the liver injury as a consequence of the systemic inflammation developed in  
19 response to the SARS-CoV-2. Other concomitant medications were also considered; however, no  
20 improvement was observed after discontinuation of the medications, and the relevance was  
21 difficult to determine.

22 To the best of our knowledge, there is only one case report of favipiravir-induced liver  
23 injury, despite the high frequency of abnormal LFTs and/or liver injury in clinical studies of  
24 favipiravir among patients with COVID-19 [7]. Yamazaki et al. [7] reported that a 73-year-old  
25 patient with a history of alcoholic hepatitis received favipiravir at 6000 mg/day on the first day  
26 and 2400 mg/day from the second day for 14 days; however, subsequently developed a  
27 favipiravir-induced cholestatic liver injury with a score of 6 (possible) based on the R factor and  
28 CIMOS/RUCAM scoring system [9]. This case report also suggested that favipiravir exposure  
29 may have contributed to drug-induced liver injury; however, favipiravir concentrations were not

1 measured. In the present study, three episodes were classified as two cholestatic and one  
2 hepatocellular liver injury, with a score above three (possible).

3 Favipiravir may also possibly cause liver damage from the viewpoint of its chemical  
4 structure. Pyrazinamide, an antituberculosis drug, has a typical side effect of hepatotoxicity, with  
5 unclear mechanism; however, is dose-dependent [16]. Favipiravir is structurally quite similar to  
6 pyrazinamide and may be regarded as a potentially hepatotoxic drug in a dose-dependent manner.

7 The number of patients involved was quite small, which was a limitation of this study.  
8 Thus, representativeness is relatively insufficient, and the samples can only represent the general  
9 situation to a certain extent. However, our findings indicate a difference in serum favipiravir  
10 concentrations between patients with and without favipiravir-induced liver injury. Additionally,  
11 large variations in favipiravir concentrations were observed (steady-state  $C_{\min}$ : 3.1–72.4 mg/L) in  
12 this study of patients without renal and underlying hepatic impairment. The  $C_{\min}$  values in patient  
13 3 decreased from 115.5 (55.5–144.8) mg/L to 5.4 (3.8–44.6) mg/L after introducing CHDF.  
14 Although the influence of continuous renal replacement therapy (CRRT) on the clearance of  
15 favipiravir is unclear, this case suggests that evaluating the influence of CRRT could be  
16 significant for considering the optimum dose of favipiravir. These findings indicate that a  
17 pharmacokinetic multinational study should be performed with larger samples to reveal the  
18 significant covariates and elucidate the potentially exposure-dependent favipiravir-induced liver  
19 injury.

20

## 21 **5. Conclusion**

22 Higher favipiravir serum concentrations were observed in patients who developed  
23 favipiravir-induced liver injury than in those without injury. As the variations in favipiravir  
24 concentrations between patients were large, pharmacokinetic and pharmacodynamic analyses  
25 should be performed in larger populations to identify the optimum favipiravir therapy and  
26 evaluate the association between adverse effects and favipiravir serum concentrations.

27

## 1 **Conflicts of interest**

2 None to declare.

## 3 **Funding**

4 This work was supported by the Research Program on Emerging and Re-emerging  
5 Infectious Diseases from the Japan Agency for Medical Research and Development (AMED)  
6 grant number JP20he0622035, and Japan Society for the Promotion of Science (JSPS)  
7 KAKENHI grant numbers JP18J23248 and JP19K08950.

8

## 9 **Acknowledgments**

10 We thank Rei Yasukochi for supporting the measurements of favipiravir concentrations.

11

## 12 **Author contributions**

13 H.K. and Y.Y. contributed to the acquisition of data, participated in study design,  
14 analyzed and interpreted the data, and drafted the manuscript. Y.T. (Yasuhiro Tsuji) and C.O.  
15 contributed to the acquisition of data, the serum favipiravir concentration measurement, and  
16 edited the manuscript. H.K., Y.T. (Yusuke Takegoshi), M.K., Y.M. (Yushi Murai), K.K., A.U.,  
17 Y.M. (Yuki Miyajima), Y.F., K.N., I.S., and Y.Y. took care of the patients. Y.M. (Yoshitomo  
18 Morinaga) performed SARS-CoV-2 RT-qPCR. All authors have read and approved the final  
19 manuscript.

20

21

## References

- [1] WHO COVID-19 Dashboard. Geneva: World Health Organization, 2020. <https://covid19.who.int/> [accessed 19 April 2021].
- [2] Murai Y, Kawasuji H, Takegoshi Y, Kaneda M, Kimoto K, Ueno A, et al. A case of COVID-19 diagnosed with favipiravir induced drug fever based on positive drug-induced lymphocyte stimulation test. *Int J Infect Dis* 2021;106:33–5.
- [3] Pilkington V, Pepperrell T, Hill A. A review of the safety of favipiravir – a potential treatment in the COVID-19 pandemic? *J Virus Erad* 2020;6:45–51.
- [4] Mishima E, Anzai N, Miyazaki M, Abe T. Uric acid elevation by favipiravir, an antiviral drug. *Tohoku J Exp Med* 2020;251:87–90.
- [5] Doi Y, Hibino M, Hase R, Yamamoto M, Kasamatsu Y, Hirose M, et al. A prospective, randomized, open-label trial of early versus late favipiravir therapy in hospitalized patients with COVID-19. *Antimicrob Agents Chemother* 2020;64:e01897–20.
- [6] Udawadia ZF, Singh P, Barkate H, Patil S, Rangwala S, Pendse A, et al. Efficacy and safety of favipiravir, an oral RNA-dependent RNA polymerase inhibitor, in mild-to-moderate COVID-19: A randomized, comparative, open-label, multicenter, phase 3 clinical trial. *Int J Infect Dis* 2021;103:62–71.
- [7] Yamazaki S, Suzuki T, Sayama M, Nakada T-a, Igari H, Ishii I. Suspected cholestatic liver injury induced by favipiravir in a patient with COVID-19. *J Infect Chemother* 2021;27:390–2.
- [8] Aithal GP, Watkins PB, Andrade RJ, Larrey D, Molokhia M, Takikawa H, et al. Case definition and phenotype standardization in drug-induced liver injury. *Clin Pharmacol Ther* 2011;89:806–15.
- [9] Danan G, Teschke R. RUCAM in drug and herb induced liver injury: The update. *Int J Mol Sci* 2016;17:14.
- [10] Marra F, Smolders EJ, El-Sherif O, Boyle A, Davidson K, Sommerville AJ, et al. Recommendations for dosing of repurposed COVID-19 medications in patients with renal and hepatic impairment. *Drugs R D* 2021;21:9–27.
- [11] Wang Y, Liu S, Liu H, Li W, Lin F, Jiang L, et al. SARS-CoV-2 infection of the liver directly contributes to hepatic impairment in patients with COVID-19. *J Hepatol* 2020;73:807–16.
- [12] Cai Q, Huang D, Yu H, Zhu Z, Xia Z, Su Y, et al. COVID-19: Abnormal liver function tests. *J Hepatol* 2020;73:566–74.
- [13] Phipps MM, Barraza LH, LaSota ED, Sobieszczyk ME, Pereira MR, Zheng EX, et al. Acute liver injury in COVID-19: Prevalence and association with clinical outcomes in a large U.S. cohort. *Hepatology* 2020;72:807–17.
- [14] Ruiz P, Cardenas A. Abnormal liver blood tests among hospitalised patients with SARS-CoV2 (COVID-19). *Frontline Gastroenterol* 2021;12:87–8.
- [15] Yeoman A, Maggs DR, Gardezi SAA, Haboubi HN, Yahya MI, Yousuf F, et al. Incidence, pattern and severity of abnormal liver blood tests among hospitalised patients with SARS-COV2 (COVID-19) in South Wales. *Frontline Gastroenterol* 2021;12:89–94.
- [16] Chang KC, Leung CC, Yew WW, Lau TY, Tam CM. Hepatotoxicity of pyrazinamide: cohort and case-control analyses. *Am J Respir Crit Care Med* 2008;177:1391–6.

## Figure captions

**Figure 1.** Boxplots of  $C_{\min}$  of the patients with and without favipiravir-induced liver injury.

For each boxplot, the horizontal line across the box within each box represents the median, each box represents the range between the 25th and 75th percentiles, the two whiskers represent the minimum and maximum values that are within  $1.5 \times$  interquartile range (IQR), and points beyond the whiskers represent outliers. Closed circles represent the mean  $C_{\min}$  values at the steady-state of each patient.

**Figure 2.** Variations of favipiravir concentrations versus time plots.

Numbers represent each patient number, and the red color represents favipiravir concentrations after introducing continuous hemodiafiltration (CHDF).

## Tables

**Table 1.** Demographic and clinical characteristics of the nine patients in this study.

| Patient number | Age range (year) | Sex    | Weight (kg) | Underlying comorbidities                                                  | Liver disease | Habitually ingested alcohol (drinks per day, 10 g ethanol for each drink) | Severity of COVID-19 | The type of favipiravir-induced liver injury, the occurrence days after favipiravir initiation (days) | Duration of favipiravir administration (days) | Reason for favipiravir discontinuation |
|----------------|------------------|--------|-------------|---------------------------------------------------------------------------|---------------|---------------------------------------------------------------------------|----------------------|-------------------------------------------------------------------------------------------------------|-----------------------------------------------|----------------------------------------|
| 1              | 60–69            | Male   | 74.0        | Hypertension, dyslipidemia, diabetes, primary aldosteronism               | -             | -                                                                         | Severe               | -                                                                                                     | 14                                            | -                                      |
| 2              | 80–89            | Male   | 68.0        | Hypertension, cerebral infarction, hyperuricemia                          | -             | -                                                                         | Severe               | -                                                                                                     | 7                                             | Suspected drug fever                   |
| 3              | 50–59            | Male   | 49.5        | Hypertension, glaucoma                                                    | -             | -                                                                         | Critically ill       | Cholestatic, 11                                                                                       | 14                                            | -                                      |
| 4              | 90–99            | Female | 48.3        | Hypertension, Alzheimer-type dementia, ovarian tumor                      | -             | 2                                                                         | Severe               | Cholestatic, 13                                                                                       | 13                                            | Liver injury                           |
| 5              | 50–59            | Male   | 78.0        | Hypertension, dyslipidemia, diabetes, hyperuricemia, sleep apnea syndrome | Fatty liver   | 4                                                                         | Severe               | Hepatocellular, 14                                                                                    | 14                                            | -                                      |
| 6              | 70–79            | Female | 62.0        | Hypertension, dyslipidemia                                                | -             | -                                                                         | Critically ill       | -                                                                                                     | 14                                            | -                                      |

|   |       |      |      |              |             |   |          |   |    |                      |
|---|-------|------|------|--------------|-------------|---|----------|---|----|----------------------|
| 7 | 70–79 | Male | 82.0 | None         | Fatty liver | - | Severe   | - | 14 | -                    |
| 8 | 50–59 | Male | 68.0 | Hypertension | -           | - | Moderate | - | 7  | Suspected drug fever |
| 9 | 50–59 | Male | 69.2 | None         | -           | 4 | Moderate | - | 10 | -                    |



**Table 2.** Univariable analysis of clinical characteristics between patients with or without favipiravir-induced liver injury.

| Characteristics                                      | Overall patients, n = 9 | Patients with liver injury, n = 3 | Patients without liver injury, n = 6 | P-value |
|------------------------------------------------------|-------------------------|-----------------------------------|--------------------------------------|---------|
| <b>Demographics</b>                                  |                         |                                   |                                      |         |
| Age (years), median (IQR)                            | 62 (54.5–81)            | 55 (54–90)                        | 70 (56–80)                           | 0.90    |
| Sex (male/female), (%/%)                             | 7/2 (77.8/22.2)         | 2/1 (66.7/33.3)                   | 5/1 (83.3/16.7)                      | 1.00    |
| Body weight (kg), median (IQR)                       | 68 (55.8–76)            | 49.5 (48.3–78.0)                  | 68.6 (66.5–76.0)                     | 0.36    |
| <b>Underlying comorbidities, n (%)</b>               |                         |                                   |                                      |         |
| Hypertension                                         | 7 (77.8)                | 3 (100.0)                         | 4 (66.7)                             | 0.50    |
| Dyslipidemia                                         | 3 (33.3)                | 1 (33.3)                          | 2 (33.3)                             | 1.00    |
| Diabetes                                             | 2 (22.2)                | 1 (33.3)                          | 1 (16.7)                             | 1.00    |
| Habitually ingested alcohol                          | 3 (33.3)                | 2 (66.6)                          | 1 (16.7)                             | 0.23    |
| <b>Liver disease, n (%)</b>                          |                         |                                   |                                      |         |
| Fatty liver                                          | 2 (22.2)                | 1 (33.3)                          | 1 (16.7)                             | 1.00    |
| <b>Laboratory findings at baseline, median (IQR)</b> |                         |                                   |                                      |         |
| ALT (U/L)                                            | 47 (35–69.5)            | 60 (45–82)                        | 43 (26.3–55.8)                       | 0.25    |
| ALP (U/L)                                            | 67.6 (40.6–117.8)       | 89.3 (36.1–118.0)                 | 67.3 (41.5–124.5)                    | 1.00    |

|                                                             |                 |                  |                  |      |
|-------------------------------------------------------------|-----------------|------------------|------------------|------|
| Total bilirubin (mg/dL)                                     | 0.5 (0.5–0.85)  | 0.5 (0.3–0.6)    | 0.6 (0.5–1.03)   | 0.28 |
| Serum creatinine (mg/dL)                                    | 1.02 (0.9–1.23) | 1.15 (0.97–1.30) | 0.96 (0.87–1.09) | 0.30 |
| Severity, n (%)                                             |                 |                  |                  |      |
| Moderate                                                    | 2 (22.2)        | 0 (0.0)          | 2 (33.3)         | 0.50 |
| Severe                                                      | 5 (55.6)        | 2 (66.7)         | 3 (50.0)         | 1.00 |
| Critically ill                                              | 2 (22.2)        | 1 (33.3)         | 1 (16.7)         | 1.00 |
| Duration of favipiravir administration (days), median (IQR) | 14 (8.5–14)     | 14 (13–14)       | 12 (7–14)        | 0.48 |
| Adverse effects, n (%)                                      |                 |                  |                  |      |
| Hyperuricemia                                               | 8 (88.9)        | 2 (66.7)         | 6 (100.0)        | 0.33 |
| Suspected drug-induced fever                                | 2 (22.2)        | 0 (0.0)          | 2 (33.3)         | 0.50 |
| Discontinuation of favipiravir during treatment, n (%)      | 3 (33.3)        | 1 (33.3)         | 2 (33.3)         | 1.00 |
| Other treatment, n (%)                                      |                 |                  |                  |      |
| Remdesivir                                                  | 1 (11.1)        | 0 (0.0)          | 1 (16.7)         | 1.00 |
| Dexamethasone                                               | 4 (44.4)        | 0 (0.0)          | 4 (66.7)         | 0.17 |
| Antibiotic therapy                                          | 6 (66.7)        | 3 (100.0)        | 3 (50.0)         | 0.46 |

IQR, interquartile range; ALT, alanine transferase; ALP, alkaline phosphatase

Figure 1

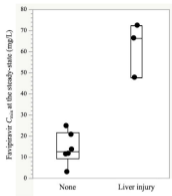

Figure 2

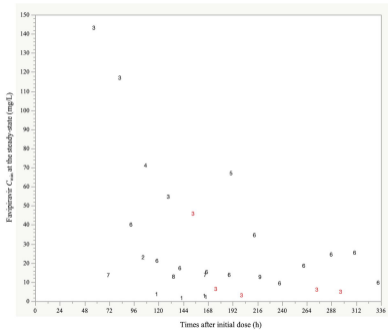

Source: https://www.medrxiv.org/content/10.1101/2021.05.03.21256437v1.full.pdf
